# Supplementary material for: Modulation of Distribution and Diffusion through the Lipophilic Membrane with Cyclodextrins Exemplified by a Model Pyridinecarboxamide Derivative
Source: MDPI journal article supplement (doi:10.3390/pharmaceutics15051531), 2023-05-18
Supplement: s1 [file s1]

## Supplementary Material

# Modulation of Distribution and Diffusion through the Lipophilic Membrane with Cyclodextrins Exemplified by a Model Pyridinecarboxamide Derivative

Tatyana Volkova, Olga Simonova and German Perlovich \*

G.A. Krestov Institute of Solution Chemistry RAS, 153045 Ivanovo, Russia;  
vtv@isc-ras.ru (T.V.); ors@isc-ras.ru (O.S.)

\* Correspondence: glp@isc-ras.ru; Tel.: +7-(4932)-336990

### Table of Contents

|           |                                                                                                                                                                                                |   |
|-----------|------------------------------------------------------------------------------------------------------------------------------------------------------------------------------------------------|---|
| Figure S1 | Temperature dependences of IPN solubility in 1-octanol and n-hexane (mole fraction scale).                                                                                                     | 2 |
| Table S1  | Molar concentrations ( $C_2$ ) of IPN, INZ, and iNAM in the organic and aqueous phases of the distribution systems.                                                                            | 3 |
| Table S2  | Donor solution concentrations ( $C$ ), steady penetrate rate - flux ( $J$ ), and permeability coefficients ( $P_{app}$ ) of IPN, INZ and iNAM across the PermeaPad barrier at 310.2 K, pH 7.4. | 3 |

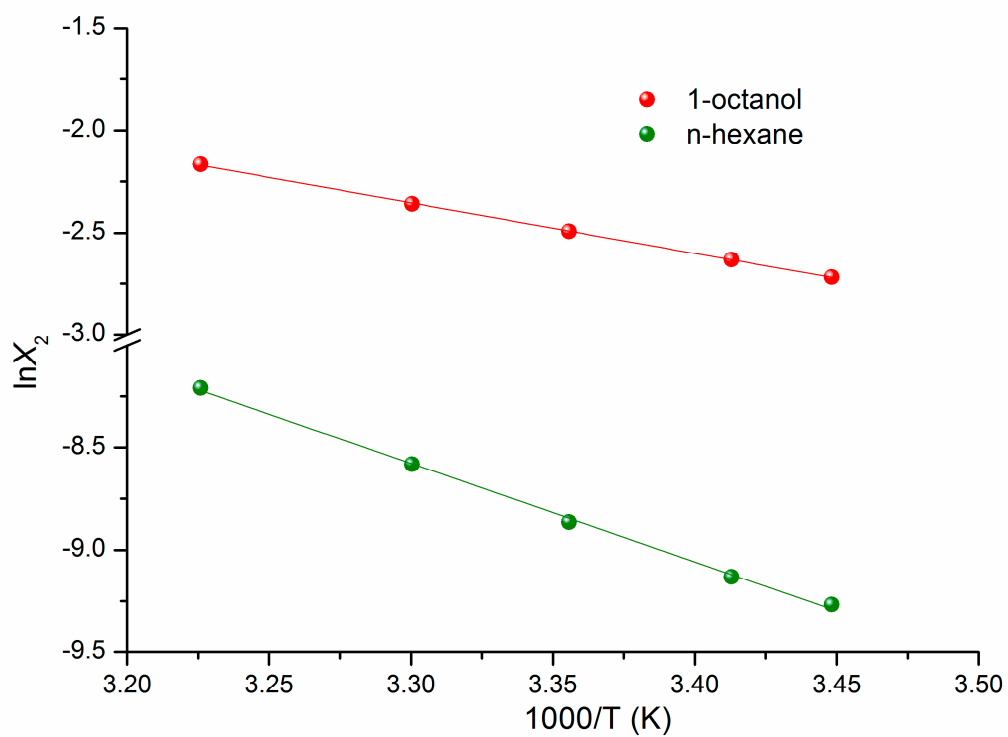

**Figure S1.** Temperature dependences of IPN solubility in 1-octanol and n-hexane (mole fraction scale).

**Table S1.** Molar concentrations ( $C_2$ ) of IPN, INZ, and iNAM in the organic and aqueous phases of the distribution systems.

| Compound                     | $C_2^{oct/buf} \cdot 10^3$           | $C_2^{buf/oct} \cdot 10^3$ | $C_2^{hex/buf} \cdot 10^5$          | $C_2^{buf/hex} \cdot 10^3$ |
|------------------------------|--------------------------------------|----------------------------|-------------------------------------|----------------------------|
|                              | <sup>a</sup> 1-octanol/buffer pH 7.4 |                            | <sup>b</sup> n-hexane/buffer pH 7.4 |                            |
| IPN                          | 4.48                                 | 1.69                       | 1.60                                | 6.46                       |
| INZ                          | 3.36                                 | 5.31                       | 4.67                                | 9.54                       |
| iNAM                         | 2.83                                 | 6.33                       | 13.71                               | 8.64                       |
| IPN/0.0115 M HP- $\beta$ -CD | 4.54                                 | 1.88                       | 1.93                                | 6.35                       |
| IPN/0.025 M HP- $\beta$ -CD  | 4.13                                 | 1.93                       | 0.90                                | 6.26                       |
| IPN/0.035 M HP- $\beta$ -CD  | 4.32                                 | 2.25                       | 0.37                                | 6.58                       |
| IPN/0.0115 M M- $\beta$ -CD  | 4.27                                 | 1.67                       | 2.23                                | 6.59                       |
| IPN/0.025 M M- $\beta$ -CD   | 4.50                                 | 1.83                       | 1.43                                | 6.36                       |
| IPN/0.035 M M- $\beta$ -CD   | 4.05                                 | 1.72                       | 1.20                                | 6.52                       |

<sup>a</sup>V(oct):V(buf)= 3:3; <sup>b</sup>V(hex):V(buf)= 6:3 and 10:3 without and with cyclodextrins, respectively.

The standard uncertainties are  $u(T)=0.5$  K. The relative standard uncertainties are  $u_r(C_2^{oct/buf})$ ;  $u_r(C_2^{buf/oct})$ ;  $u_r(C_2^{hex/buf})$ ; and  $u_r(C_2^{buf/hex})=0.04$ .

**Table S2.** Donor solution concentrations (C), steady penetrate rate - flux (J), and permeability coefficients ( $P_{app}$ ) of IPN, INZ and iNAM across the PermePad barrier at 310.2 K, pH 7.4.

| System                       | $C \cdot 10^3$ (M) | $J \cdot 10^4$ ( $\mu\text{M} \cdot \text{cm}^{-2} \cdot \text{s}^{-1}$ ) | $P_{app} \cdot 10^5$ ( $\text{cm} \cdot \text{s}^{-1}$ ) |
|------------------------------|--------------------|---------------------------------------------------------------------------|----------------------------------------------------------|
| IPN                          | 6.13               | 1.25                                                                      | 2.03 $\pm$ 0.05                                          |
| INZ                          | -                  | -                                                                         | <sup>a</sup> 1.44 $\pm$ 0.08                             |
| iNAM                         | 8.10               | 0.59                                                                      | 0.73 $\pm$ 0.04                                          |
| IPN/0.0115 M HP- $\beta$ -CD | 5.42               | 1.02                                                                      | 1.88 $\pm$ 0.05                                          |
| IPN/0.025 M HP- $\beta$ -CD  | 5.79               | 1.05                                                                      | 1.81 $\pm$ 0.03                                          |
| IPN/0.035 M HP- $\beta$ -CD  | 6.42               | 1.14                                                                      | 1.78 $\pm$ 0.02                                          |
| IPN/0.0115 M M- $\beta$ -CD  | 6.58               | 1.64                                                                      | 2.49 $\pm$ 0.05                                          |
| IPN/0.025 M M- $\beta$ -CD   | 3.79               | 1.05                                                                      | 2.77 $\pm$ 0.03                                          |
| IPN/0.035 M M- $\beta$ -CD   | 6.16               | 1.77                                                                      | 2.87 $\pm$ 0.04                                          |

<sup>a</sup> - taken from [11].
